# Supplementary material
Source: PubMed Central journal article supplement (PMC4989248)
Supplement: ac6b02240_si_001.pdf [file ac6b02240_si_001.pdf]

*Supporting Information:*

**Developing a Novel Acidic Residue Reactive and Sulfoxide-containing MS-cleavable  
Homobifunctional Cross-linker for Probing Protein-Protein Interactions**

Craig B. Gutierrez<sup>1#</sup>, Clinton Yu<sup>1#</sup>, Eric J. Novitsky<sup>2</sup>, Alexander S. Huszagh<sup>1</sup>, Scott D.  
Rychnovsky<sup>2</sup>, Lan Huang<sup>1\*</sup>

<sup>1</sup>Department of Physiology and Biophysics, University of California, Irvine, CA 92697

<sup>2</sup>Department of Chemistry, University of California, Irvine, CA 92697

#: These authors contributed equally

\*Correspondence should be addressed to Dr. Lan Huang (lanhuang@uci.edu)

Medical Science I, D233

Department of Physiology & Biophysics

University of California, Irvine

Irvine, CA 92697-4560

Phone: (949) 824-8548

Fax: (949) 824-8540

## **TABLE OF CONTENTS**

**1. Supplemental Methods**

**2. Supplemental Figures**

**3. References**

**4. Supplemental Tables**

## SUPPLEMENTAL METHODS

### *Dihydrazide Sulfoxide (DHSO) Synthesis*

Disuccinimidyl sulfoxide (DSSO) was synthesized as previously published<sup>1</sup>. The 2-step synthesis scheme for DHSO from DSSO is depicted in Figure 1D. Briefly, *tert*-butyl carbazate (1.10 g, 8.32 mmol) was added to DSSO (1.41 g, 4.16 mmol) in DCM (50 mL). The resulting yellow solution was let stir at room temperature for 12 h, after which trifluoroacetic acid (2.20 mL, 28.7 mmol) was added. The resulting orange solution was let stir for 72 h before removing the solvent in vacuo. The resulting orange oil was dissolved in methanol, and then triethylamine was added. The resulting mixture was let stir for 20 mins, after which a white solid had precipitated. The solid was collected via centrifuge, and then stirred with fresh methanol for 20 mins. The solid was collected via centrifuge again, and this process of stirring with fresh methanol was repeated another two times. Drying the isolated white solid in vacuo afforded DHSO (0.375 g, 46%): mp 159–162 °C; <sup>1</sup>H NMR (500 MHz, DMSO-*d*<sub>6</sub>): δ 9.13 (s, 2H), 4.24 (s, 4H), 3.0–2.97 (m, 2H), 2.83–2.75 (m, 2H), 2.43 (t, *J* = 7.5 Hz, 4H); <sup>13</sup>C NMR (125 MHz, DMSO-*d*<sub>6</sub>): δ 169.3, 46.7, 26.2; IR (thin film): 3308, 3044, 1631, 1449, 1297, 1032 cm<sup>-1</sup>; HRMS (ESI) *m/z* calculated for C<sub>6</sub>H<sub>15</sub>N<sub>4</sub>O<sub>3</sub>S [M + H]<sup>+</sup> 223.0865, found 223.0857.

### *Digestion of DHSO Cross-linked Proteins*

For in-gel digestion, cross-linked proteins were separated by SDS-PAGE and visualized by Coomassie blue staining. The selected cross-linked gel bands were excised, reduced with TCEP for 30 min, alkylated with iodoacetamide for 30 min in the dark, and then digested with trypsin at 37°C overnight. Peptide digests were extracted, concentrated, and reconstituted in 3% ACN/2% formic acid for MS<sup>n</sup> analysis. For in-solution digestion, cross-linked proteins were first precipitated with TCA and then re-suspended in 8M urea buffer. Reduction and alkylation were

performed prior to Lys-C/trypsin digestion as previously described <sup>2</sup>. The resulting digests were desalted using Waters C18 Sep-Pak cartridges and fractionated by peptide size exclusion chromatography (SEC) based on the protocol by Leitner et al. <sup>3</sup>. The fractions containing cross-linked peptides were collected for subsequent MS<sup>n</sup> analysis.

### ***Liquid Chromatography-Multistage Tandem Mass Spectrometry (LC MS<sup>n</sup>) Analysis***

Each MS<sup>n</sup> experiment consists of one MS scan in FT mode (350-1400 m/z, resolution of 60,000 at m/z 400) followed by two data-dependent MS<sup>2</sup> scans in FT mode (resolution of 7500) with normalized collision energy at 10% on the top two MS peaks with charges 4+ or higher, and three MS<sup>3</sup> scans in the LTQ with normalized collision energy at 35% on the top three peaks from each MS<sup>2</sup>.

### ***Data Analysis and Identification of DHSO Cross-linked Peptides***

MS<sup>n</sup> Data extraction and analysis were performed in the same way as previously described <sup>4</sup>. MS<sup>3</sup> data was subjected to a developmental version of Protein Prospector (v.5.16.0) for database searching, using Batch-Tag against SwissProt.2014.12.4.random.concat databases limited to either the *Bos taurus* or *Equus caballus* taxonomy with mass tolerances for parent ions and fragment ions set as  $\pm 20$  ppm and 0.6 Da, respectively. Trypsin was set as the enzyme with four maximum missed cleavages allowed. Cysteine carbamidomethylation was set as a constant modification. A maximum of four variable modifications were also allowed, including protein N-terminal acetylation, methionine oxidation, and N-terminal conversion of glutamine to pyroglutamic acid. In addition, three defined modifications representing cross-linker fragment moieties on aspartic acid and glutamic acid were selected: alkene (A, C<sub>3</sub>H<sub>4</sub>N<sub>2</sub>, +68 Da), sulfenic

acid (S, C<sub>3</sub>H<sub>6</sub>N<sub>2</sub>SO, +118 Da), and unsaturated thiol (T, C<sub>3</sub>H<sub>4</sub>N<sub>2</sub>S, +100 Da) modifications. Initial acceptance criteria for peptide identification required a reported expectation value  $\leq 0.1$ . The in-house program XL-Discoverer, a revised version of previously developed Link-Hunter, was used to validate and summarize cross-linked peptides based on MS<sup>n</sup> data and database searching<sup>1</sup>.

SUPPLEMENTAL FIGURES:

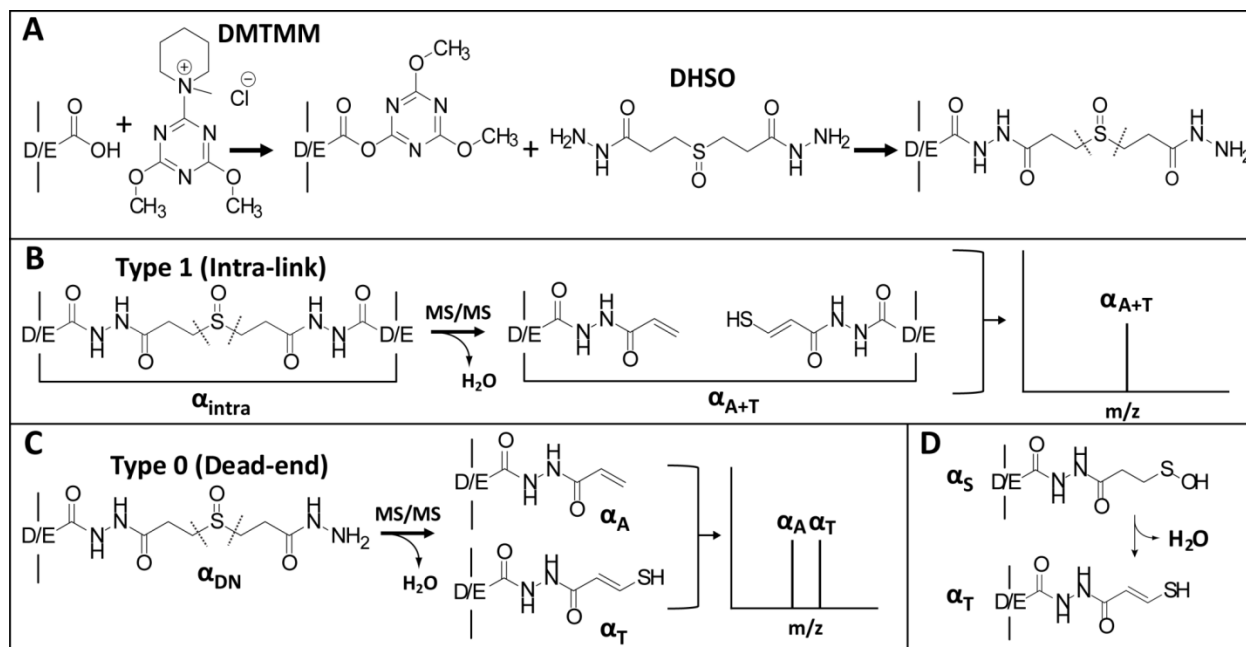

**Figure S-1. Characteristic MS<sup>2</sup> fragmentation patterns for DHSO cross-linked peptides.** (A) The scheme of peptide cross-linking by DHSO in the presence of DMTMM. MS<sup>2</sup> fragmentation of (B) DHSO intra-linked peptide  $\alpha_{\text{intra}}$ . (C) Dead-end modified peptide  $\alpha_{\text{DN}}$ . (D) The conversion scheme of  $\alpha_{\text{S}}$  to  $\alpha_{\text{T}}$ . Note: S\* (sulfenic acid moiety) can be converted to the more stable unsaturated thiol moiety (T) via water loss as shown in (D).

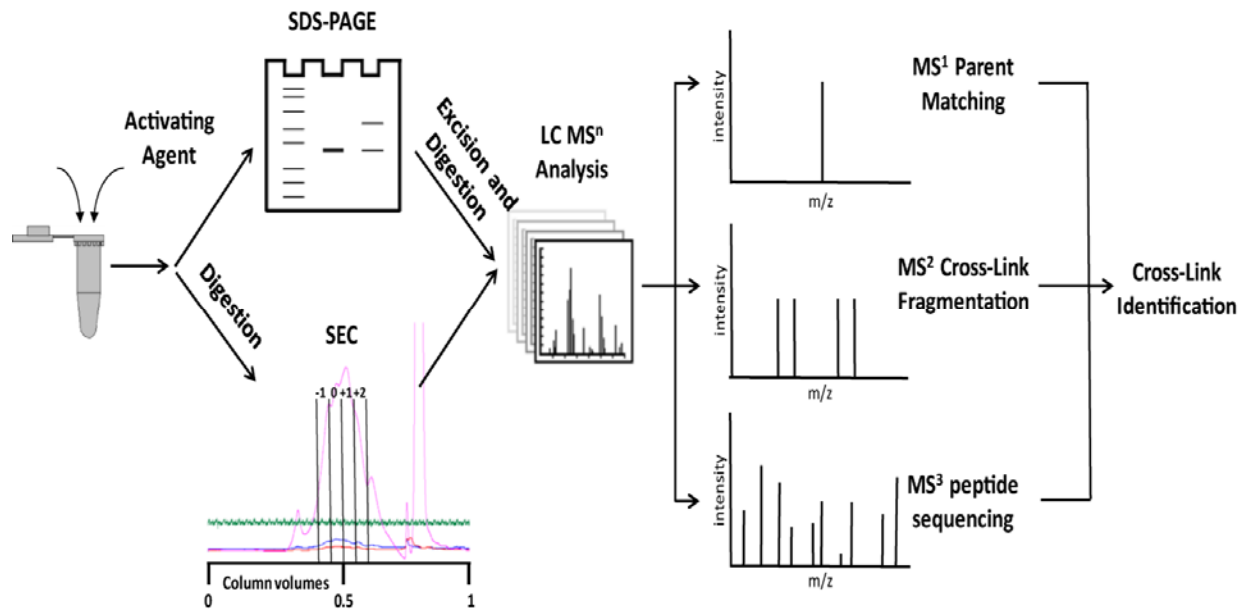

**Figure S-2.** The general XL-MS workflow for the identification of cross-linked DHSO peptides from proteins.

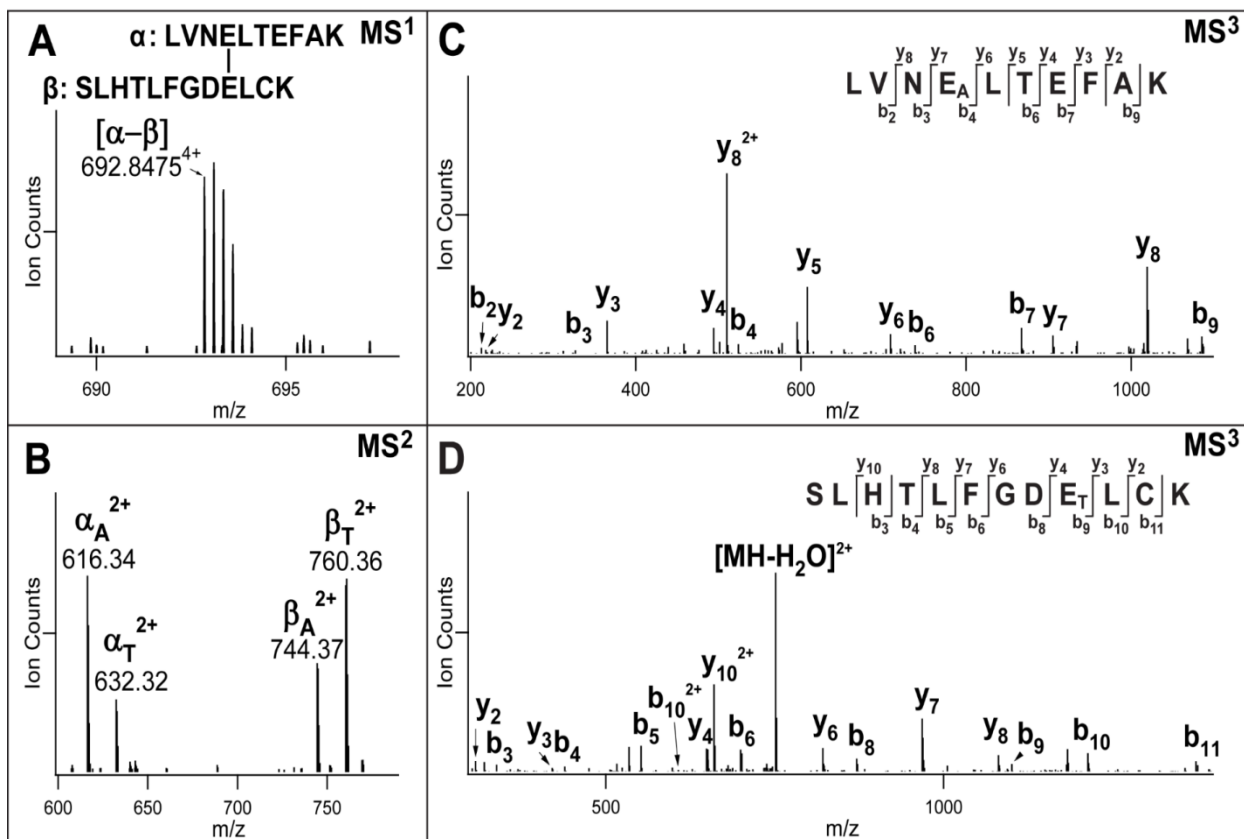

**Figure S-3. MS<sup>n</sup> analysis of a representative DHSO inter-linked BSA peptide.** (A) MS spectrum of a DHSO interlinked BSA peptide  $\alpha$ - $\beta$  ( $m/z$  692.8475<sup>4+</sup>). (B) MS<sup>2</sup> spectrum of the cross-linked peptide detected in (A). MS<sup>3</sup> spectra of MS<sup>2</sup> fragment ions (C)  $\alpha_A$  ( $m/z$  616.34<sup>2+</sup>) and (D)  $\beta_T$  ( $m/z$  760.36<sup>2+</sup>).



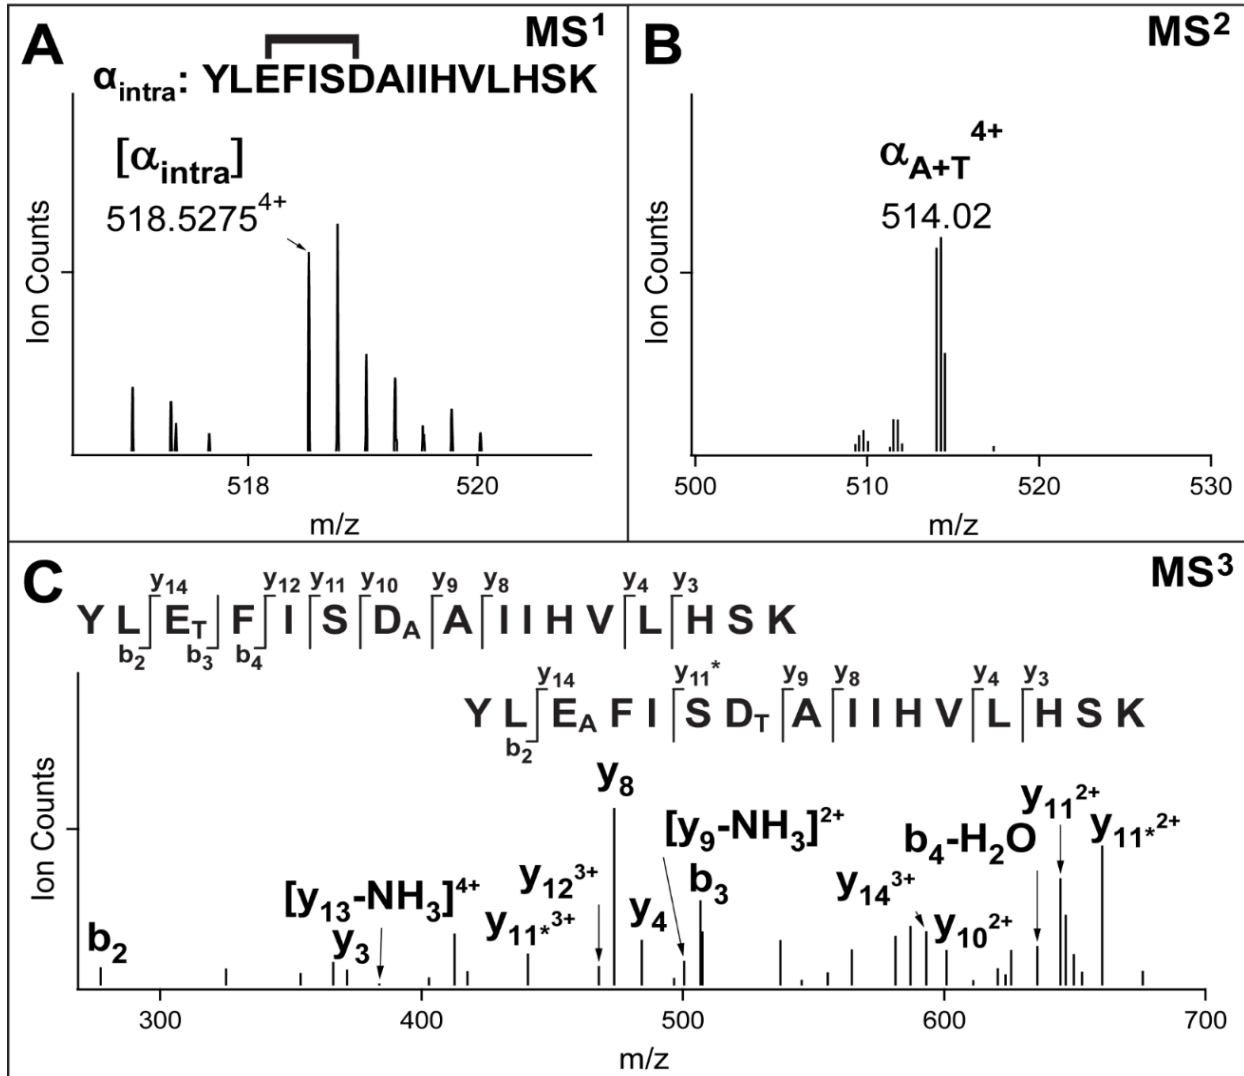

**Figure S-4. MS<sup>n</sup> analysis of a DHSO intra-linked myoglobin peptide.** (A) MS spectrum of a DHSO intra-linked myoglobin peptide  $\alpha_{\text{intra}}$  ( $m/z$  518.5275<sup>4+</sup>). (B) MS<sup>2</sup> spectrum of the intra-linked peptide in (A). (C) MS<sup>3</sup> spectrum of the MS<sup>2</sup> fragment ion  $\alpha_{\text{A+T}}$  ( $m/z$  514.02<sup>4+</sup>).

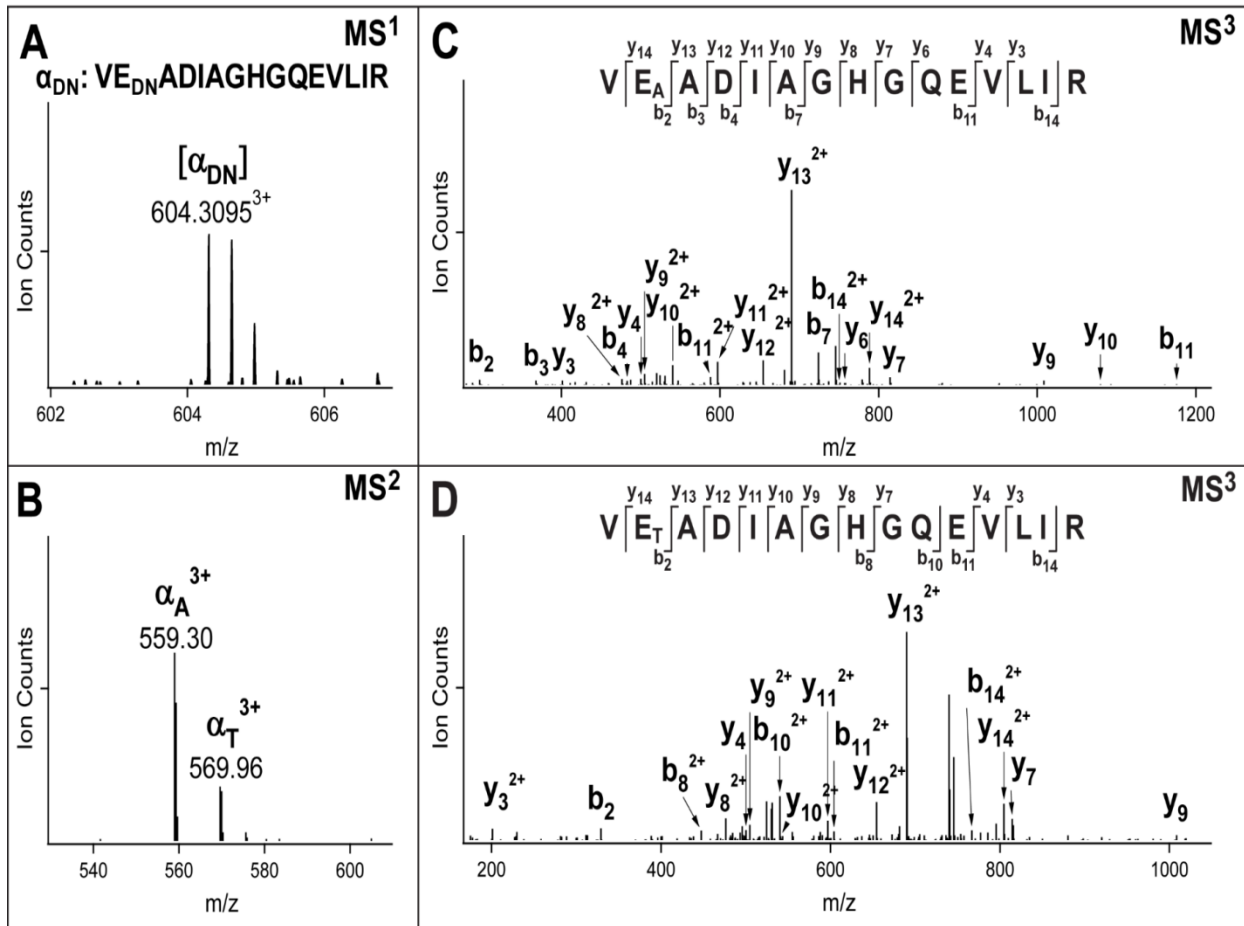

**Figure S-5.  $MS^n$  analysis of a DHSO dead-end modified myoglobin peptide.** (A)  $MS^1$  spectrum of a DHSO dead-end modified myoglobin peptide  $\alpha_{DN}$  (604.3095<sup>3+</sup>). (B)  $MS^2$  spectrum of the parent ion detected in (A).  $MS^3$  spectra of  $MS^2$  fragment ions (C)  $\alpha_A$  (m/z 559.30<sup>3+</sup>) and (D)  $\alpha_T$  (m/z 569.96<sup>3+</sup>).

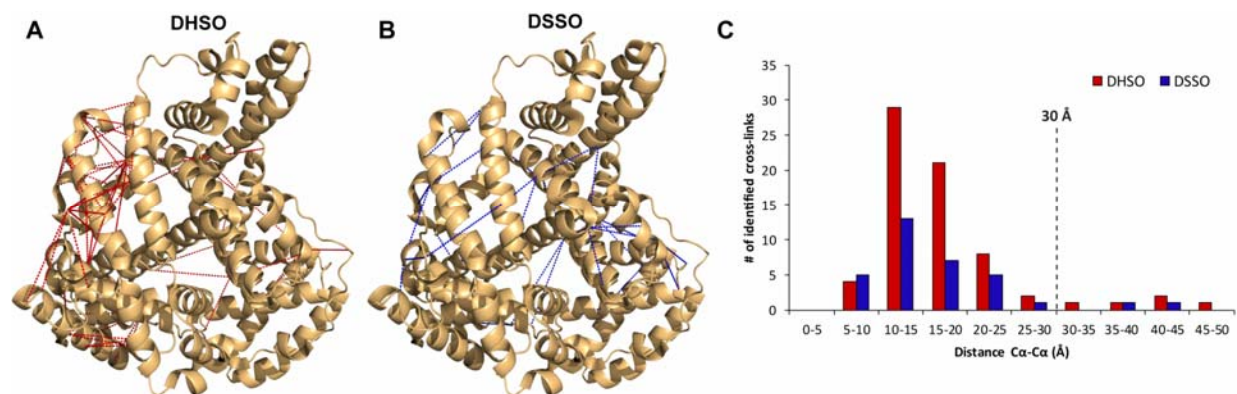

**Figure S-6.** BSA cross-link maps on its crystal structure (PDB: 4F5S). (A) with DHSO cross-link map (red). (B) DSSO cross-link map (blue). (C) The distribution plot of identified linkages vs. their spatial distances between D|E-D|E for DHSO (red) or K-K for DSSO (blue) in BSA structure.

## REFERENCES

- (1) Kao, A.; Chiu, C. L.; Vellucci, D.; Yang, Y.; Patel, V. R.; Guan, S.; Randall, A.; Baldi, P.; Rychnovsky, S. D.; Huang, L. *Mol Cell Proteomics* **2011**, *10*, M110.002212.
- (2) Wang, X.; Chen, C. F.; Baker, P. R.; Chen, P. L.; Kaiser, P.; Huang, L. *Biochemistry* **2007**, *46*, 3553-3565.
- (3) Leitner, A.; Walzthoeni, T.; Aebersold, R. *Nat Protoc* **2014**, *9*, 120-137.
- (4) Yu, C.; Kandur, W.; Kao, A.; Rychnovsky, S.; Huang, L. *Anal Chem* **2014**, *86*, 2099-2106.

**Table S-1. Detailed Summary of DHSO Inter-Linked Myoglobin Peptides Identified by LC MS<sup>n</sup>**

| #  | Peptide Seq                       | AA location            | MS m/z   | z | $\Delta$ (PPM) | Mod. Position                                                              | MS2 m/z            | z      | Distance (C $\alpha$ -C $\alpha$ ) |
|----|-----------------------------------|------------------------|----------|---|----------------|----------------------------------------------------------------------------|--------------------|--------|------------------------------------|
| 1  | ALELFR<br>ALELFR                  | A135-R140<br>A135-R140 | 421.2357 | 4 | 0.186          | E <sub>T</sub> 137<br>E <sub>A</sub> 137                                   | 424.726<br>408.740 | 2<br>2 | -                                  |
| 2  | HPGDFGADAQGAM(ox)TK<br>ALELFR     | H120-K134<br>A135-R140 | 613.7913 | 4 | -2.547         | D <sub>A</sub> 123 D <sub>A</sub> 127<br>E <sub>A</sub> 137                | 793.885<br>408.740 | 2<br>2 | 21.6Å 15.4Å                        |
| 3  | HPGDFGADAQGAMTK<br>ALELFR         | H120-K134<br>A135-R140 | 609.7944 | 4 | .435           | D <sub>A</sub> 127<br>E <sub>A</sub> 137                                   | 785.859<br>408.741 | 2<br>2 | 15.4Å                              |
| 4  | KKGHHEAELKPLAQSHATK<br>ELGFQG     | K79-K97<br>E149-G154   | 737.1354 | 4 | 1.188          | E <sub>A</sub> 84 E <sub>A</sub> 86<br>E <sub>A</sub> 149                  | 726.736<br>718.335 | 3<br>1 | 14.1Å 16.8Å                        |
| 5  | LFTGHPETLEK<br>ALELFR             | L33-K43<br>A135-R140   | 441.8353 | 5 | -0.494         | E <sub>T</sub> 42<br>E <sub>A</sub> 137                                    | 457.895<br>408.740 | 3<br>2 | 24.4Å                              |
| 6  | LFTGHPETLEK<br>ALELFR             | L33-K43<br>A135-R140   | 441.8364 | 5 | 1.996          | E <sub>A</sub> 39 E <sub>A</sub> 42<br>E <sub>A</sub> 137                  | 447.239<br>408.740 | 3<br>2 | 22.0Å 24.4Å                        |
| 7  | LFTGHPETLEK<br>TEAEM(ox)K         | L33-K43<br>T52-K57     | 437.0133 | 5 | 2.713          | E <sub>T</sub> 39 E <sub>T</sub> 42<br>E <sub>A</sub> 53                   | 437.895<br>396.682 | 3<br>2 | 14.6 Å 14.7Å                       |
| 8  | LFTGHPETLEK<br>TEAEMK             | L33-K43<br>T52-K57     | 542.0137 | 4 | -1.652         | E <sub>T</sub> 42<br>E <sub>A</sub> 53 E <sub>A</sub> 55                   | 686.342<br>388.685 | 2<br>2 | 14.7Å 15.4Å                        |
| 9  | LFTGHPETLEK<br>TEAEM(ox)K         | L33-K43<br>T52-K57     | 546.2628 | 4 | -3.499         | E <sub>T</sub> 39<br>E <sub>A</sub> 53                                     | 686.341<br>396.682 | 2<br>2 | 14.6Å                              |
| 10 | LFTGHPETLEK<br>TEAEM(ox)K         | L33-K43<br>T52-K57     | 546.0119 | 4 | -2.068         | E <sub>T</sub> 42<br>E <sub>A</sub> 53                                     | 686.341<br>396.682 | 2<br>2 | 14.7Å                              |
| 11 | LFTGHPETLEK<br>TEAEMK             | L33-K43<br>T52-K57     | 433.8133 | 5 | 0.389          | E <sub>T</sub> 42<br>E <sub>A</sub> 55                                     | 457.896<br>388.685 | 3<br>2 | 15.4Å                              |
| 12 | LFTGHPETLEK<br>LFTGHPETLEK        | L33-K43<br>L33-K43     | 546.4794 | 5 | -3.081         | E <sub>T</sub> 39 E <sub>T</sub> 42<br>E <sub>A</sub> 39 E <sub>A</sub> 42 | 686.340<br>447.238 | 2<br>3 | -                                  |
| 13 | LFTGHPETLEK<br>LFTGHPETLEK        | L33-K43<br>L33-K43     | 683.1003 | 4 | -0.109         | E <sub>A</sub> 39 E <sub>A</sub> 42<br>E <sub>T</sub> 42                   | 670.355<br>686.339 | 2<br>2 | -                                  |
| 14 | LFTGHPETLEK<br>LFTGHPETLEK        | L33-K43<br>L33-K43     | 682.8481 | 4 | -2.906         | E <sub>A</sub> 42<br>E <sub>T</sub> 42                                     | 670.354<br>686.340 | 2<br>2 | -                                  |
| 15 | LFTGHPETLEK<br>LFTGHPETLEK        | L33-K43<br>L33-K43     | 683.3470 | 4 | -6.165         | E <sub>A</sub> 39<br>E <sub>T</sub> 42                                     | 670.355<br>686.339 | 2<br>2 | -                                  |
| 16 | TEAEM(ox)K<br>ALELFR              | T52-K57<br>A135-R140   | 415.2066 | 4 | 0.561          | E <sub>A</sub> 53<br>E <sub>T</sub> 137                                    | 396.681<br>424.725 | 2<br>2 | 28.0Å                              |
| 17 | TEAEMK<br>TEAEMK                  | T52-K57<br>T52-K57     | 401.1799 | 4 | 0.611          | E <sub>A</sub> 53<br>E <sub>T</sub> 53                                     | 388.684<br>404.67  | 2<br>2 | -                                  |
| 18 | TEAEMK<br>ASEDLK                  | T52-K57<br>A58-K63     | 421.7067 | 4 | 1.031          | E <sub>A</sub> 53 E <sub>A</sub> 55<br>E <sub>T</sub> 60 D <sub>T</sub> 61 | 388.684<br>445.722 | 2<br>2 | 13.0Å 9.8Å<br>14.0Å 11.0Å          |
| 19 | TEAEMK<br>ASEDLK                  | T52-K57<br>A58-K64     | 421.7063 | 4 | -0.392         | E <sub>A</sub> 53<br>E <sub>T</sub> 60 D <sub>T</sub> 61                   | 388.684<br>445.724 | 2<br>2 | 13.0Å 9.8Å                         |
| 20 | TEAEMK<br>HPGDFGADAQGAMTK         | T52-K57<br>H120-K134   | 599.7642 | 4 | -3.253         | E <sub>A</sub> 53<br>D <sub>T</sub> 127                                    | 388.684<br>801.844 | 2<br>2 | 32.1Å                              |
| 21 | VEADIAGHGQEVLR<br>TEAEMK          | V18-R32<br>T52-K57     | 500.8524 | 5 | 18.47          | E <sub>T</sub> 28<br>E <sub>A</sub> 53                                     | 569.627<br>388.685 | 3<br>2 | 10.5Å                              |
| 22 | VEADIAGHGQEVLR<br>TEAEM(ox)K      | V18-R32<br>T52-K57     | 629.8124 | 4 | 0.950          | E <sub>T</sub> 28<br>E <sub>A</sub> 53 E <sub>A</sub> 55                   | 853.939<br>396.681 | 2<br>2 | 10.5Å 13.0Å                        |
| 23 | VEADIAGHGQEVLR<br>ASEDLK          | V18-R32<br>A58-K63     | 614.5657 | 4 | -2.085         | E <sub>A</sub> 19 D <sub>A</sub> 21<br>E <sub>A</sub> 60                   | 558.970<br>730.374 | 3<br>1 | 18.4Å 14.7Å                        |
| 24 | VEADIAGHGQEVLR<br>ASEDLK          | V18-R32<br>A58-K62     | 614.3143 | 4 | -2.107         | E <sub>A</sub> 19 D <sub>A</sub> 21<br>E <sub>T</sub> 60 D <sub>T</sub> 61 | 558.969<br>730.374 | 3<br>1 | 18.4Å 18.8Å<br>14.7Å 16.1Å         |
| 25 | VEADIAGHGQEVLR<br>ASEDLK          | V18-R32<br>A58-K63     | 517.2736 | 5 | 1.308          | D <sub>T</sub> 21<br>E <sub>T</sub> 60 D <sub>T</sub> 61                   | 569.627<br>445.725 | 3<br>2 | 14.7Å 16.1Å                        |
| 26 | VEADIAGHGQEVLR<br>ASEDLK          | V18-R32<br>A58-K64     | 517.2736 | 5 | 1.308          | D <sub>T</sub> 21<br>E <sub>A</sub> 60                                     | 569.627<br>429.738 | 3<br>2 | 14.7Å                              |
| 27 | VEADIAGHGQEVLR<br>HPGDFGADAQGAMTK | V18-R32<br>H120-K134   | 659.7219 | 5 | 1.861          | D <sub>T</sub> 21<br>D <sub>A</sub> 123                                    | 569.627<br>785.858 | 3<br>2 | 15.7Å                              |
| 28 | VEADIAGHGQEVLR<br>HPGDFGADAQGAMTK | V18-R32<br>H120-K134   | 659.7219 | 5 | 1.861          | D <sub>T</sub> 21<br>D <sub>T</sub> 123 D <sub>T</sub> 127                 | 569.627<br>801.847 | 3<br>2 | 15.7Å 22.3Å                        |

|    |                                   |                        |          |   |        |                                                             |                    |        |             |
|----|-----------------------------------|------------------------|----------|---|--------|-------------------------------------------------------------|--------------------|--------|-------------|
| 29 | VEADIAGHGQEVLR<br>HPGDFGADAQGAMTK | V19-R32<br>H120-K134   | 659.7193 | 5 | -2.080 | E <sub>A</sub> 19<br>D <sub>T</sub> 127                     | 558.969<br>801.843 | 3<br>2 | 19.8Å       |
| 30 | VEADIAGHGQEVLR<br>TEAEM(ox)K      | V18-R32<br>T52-K57     | 504.0492 | 5 | -2.495 | D <sub>T</sub> 21 E <sub>T</sub> 28<br>E <sub>A</sub> 53    | 569.627<br>396.681 | 3<br>2 | 20.1Å 10.5Å |
| 31 | YLEFISDAIIHVLHKS<br>ALELFR        | Y104-K119<br>A135-R140 | 564.5054 | 5 | -3.321 | D <sub>T</sub> 110<br>E <sub>A</sub> 137                    | 662.346<br>408.739 | 3<br>2 | 10.1Å       |
| 32 | YLEFISDAIIHVLHKS<br>ALELFR        | Y104-K119<br>A135-R140 | 705.3836 | 4 | 1.880  | D <sub>A</sub> 106<br>E <sub>A</sub> 137                    | 651.691<br>816.475 | 3<br>1 | 8.4Å        |
| 33 | YLEFISDAIIHVLHKS<br>ALELFR        | Y104-K119<br>A135-R140 | 564.5085 | 5 | 2.171  | D <sub>T</sub> 106 D <sub>T</sub> 110<br>E <sub>A</sub> 137 | 662.350<br>408.741 | 3<br>2 | 8.4Å 10.1Å  |

Note: “|” means or; “&” means and; “T”: unsaturated thiol moiety; “A”: alkene moiety.

**Table S-2. Detailed Summary of DHSO Inter-Linked BSA Peptides Identified by LC MS<sup>n</sup>**

| #  | Peptide Seq                         | AA location            | MS m/z   | z | Δ(PPM) | Mod. Position                                                                                   | MS2 m/z             | z      | Distance (Cα-Cα)                        |
|----|-------------------------------------|------------------------|----------|---|--------|-------------------------------------------------------------------------------------------------|---------------------|--------|-----------------------------------------|
| 1  | AEFVEVTK<br>LVTDLTK                 | A249-K256<br>L257-K263 | 475.0076 | 4 | -0.713 | E <sub>A</sub> 250<br>D <sub>A</sub> 260                                                        | 495.765<br>429.257  | 2<br>2 | 16.1Å                                   |
| 2  | AEFVEVTK<br>LVTDLTK                 | A249-K256<br>L257-K263 | 475.0078 | 4 | -0.292 | E <sub>r</sub> 253<br>D <sub>A</sub> 260                                                        | 511.752<br>429.257  | 2<br>2 | 10.9Å                                   |
| 3  | AEFVEVTK<br>QNCDQFEK                | A249-K256<br>Q413-K420 | 544.7503 | 4 | -0.181 | E <sub>A</sub> 250<br>E <sub>r</sub> 419                                                        | 495.768<br>584.731  | 2<br>2 | 45.1Å                                   |
| 4  | AEFVEVTK<br>YICDNQDTISSK            | A249-K256<br>Y286-K297 | 638.5493 | 4 | -1.936 | E <sub>A</sub> 250 E <sub>A</sub> 253<br>D <sub>r</sub> 292                                     | 495.767<br>772.330  | 2<br>2 | 11.5Å 11.6Å                             |
| 5  | AEFVEVTK<br>YICDNQDTISSK            | A249-K256<br>Y286-K297 | 638.5493 | 4 | -1.936 | E <sub>A</sub> 250<br>D <sub>r</sub> 292                                                        | 495.767<br>772.330  | 2<br>2 | 11.5Å                                   |
| 6  | AEFVEVTK<br>YICDNQDTISSK            | A249-K256<br>Y286-K297 | 638.5522 | 4 | 2.606  | E <sub>A</sub> 253<br>D <sub>r</sub> 289 D <sub>r</sub> 292                                     | 495.767<br>772.331  | 2<br>2 | 12.8Å 11.6Å                             |
| 7  | ATEEQLK<br>TVM(ox)ENFVAFVVDK        | A562-K568<br>T569-K580 | 601.5462 | 4 | -0.098 | E <sub>A</sub> 564 E <sub>A</sub> 565<br>E <sub>r</sub> 572                                     | 443.735<br>750.354  | 2<br>2 | 12.4Å 11.0Å                             |
| 8  | ATEEQLK<br>TVMENFVAFVVDK            | A562-K568<br>T569-K580 | 601.5485 | 4 | 1.611  | E <sub>A</sub> 565<br>E <sub>r</sub> 572                                                        | 443.735<br>750.356  | 2<br>2 | 11.0Å                                   |
| 9  | DTHKSEIAHR<br>VHKECCHGDLLECADDRDLAK | D25-R34<br>V264-K285   | 499.8580 | 8 | -1.939 | D <sub>r</sub> 25<br>D <sub>A</sub> 278 D <sub>A</sub> 279 D <sub>A</sub> 282                   | 431.877<br>536.846  | 3<br>5 | 21.2Å 20.9Å 21.7Å                       |
| 10 | DTHKSEIAHR<br>VHKECCHGDLLECADDRDLAK | D25-R34<br>V264-K285   | 570.9825 | 7 | 4.106  | D <sub>r</sub> 25<br>D <sub>A</sub> 279 D <sub>A</sub> 282                                      | 431.877<br>670.808  | 3<br>4 | 21.2Å 21.7Å                             |
| 11 | DTHKSEIAHR<br>VHKECCHGDLLECADDRDLAK | D25-R34<br>V264-K285   | 499.7346 | 8 | 2.110  | D <sub>r</sub> 25 E <sub>r</sub> 30<br>D <sub>A</sub> 278 D <sub>A</sub> 279 D <sub>A</sub> 282 | 431.876<br>536.847  | 3<br>5 | 21.2Å 20.9Å 21.7Å,<br>12.0Å 13.9Å 16.7Å |
| 12 | DTHKSEIAHR<br>VHKECCHGDLLECADDRDLAK | D25-R34<br>V264-K285   | 570.9843 | 8 | -0.169 | D <sub>r</sub> 25 E <sub>r</sub> 30<br>D <sub>A</sub> 278 D <sub>A</sub> 282                    | 6431.876<br>536.847 | 3<br>5 | 21.2Å 21.7Å,<br>12.0Å 16.7Å             |
| 13 | DTHKSEIAHR<br>VHKECCHGDLLECADDRDLAK | D25-R34<br>V264-K285   | 570.9797 | 7 | -0.798 | E <sub>r</sub> 30<br>D <sub>A</sub> 278 D <sub>A</sub> 279 D <sub>A</sub> 282                   | 647.311<br>536.848  | 2<br>5 | 12.0Å 13.9Å 16.7Å                       |
| 14 | DTHKSEIAHR<br>LVTDLTK               | D25-R34<br>L257-K263   | 542.7869 | 4 | 0.787  | D <sub>A</sub> 25<br>D <sub>A</sub> 260                                                         | 631.324<br>429.259  | 2<br>2 | 22.7Å                                   |
| 15 | DTHKSEIAHR<br>TCVADESHAGCEK         | D25-R34<br>T76-K88     | 711.5669 | 4 | 0.368  | D <sub>r</sub> 25<br>D <sub>A</sub> 80 E <sub>A</sub> 81                                        | 647.310<br>766.318  | 2<br>2 | 18.8Å 15.4Å                             |
| 16 | DTHKSEIAHR<br>TCVADESHAGCEK         | D25-R34<br>T76-K88     | 711.3146 | 4 | -1.686 | D <sub>r</sub> 25<br>E <sub>A</sub> 87                                                          | 647.311<br>766.316  | 2<br>2 | 14.6Å                                   |
| 17 | DLGEEHFK<br>ADEKK                   | D37-K44<br>A152-K156   | 438.2119 | 4 | 1.889  | E <sub>r</sub> 41<br>E <sub>A</sub> 154                                                         | 537.738<br>329.680  | 2<br>2 | 16.3Å 13.0Å                             |
| 18 | GLVLIAFSQYLQCPFDEHVK<br>YLIEIAR     | G45-K65<br>Y161-R167   | 902.9565 | 4 | -1.045 | D <sub>A</sub> 61 E <sub>A</sub> 62<br>E <sub>r</sub> 164                                       | 1280.660<br>514.256 | 2<br>2 | 12.4Å 13.7Å                             |
| 19 | HLVDEPQNLK<br>CCTKPESER             | H402-K412<br>C460-R468 | 665.0706 | 4 | .496   | D <sub>r</sub> 405<br>E <sub>A</sub> 465                                                        | 703.368<br>617.770  | 2<br>2 | 13.6Å                                   |
| 20 | HLVDEPQNLK<br>CCTKPESER             | H402-K412<br>C460-R468 | 665.0706 | 4 | .496   | D <sub>A</sub> 405 E <sub>A</sub> 406<br>E <sub>A</sub> 465                                     | 687.382<br>617.770  | 2<br>2 | 13.6Å 15.8Å                             |
| 21 | HLVDEPQNLK<br>CCTKPESER             | H402-K412<br>C460-R468 | 532.4614 | 5 | 5.743  | D <sub>r</sub> 405<br>E <sub>A</sub> 465 E <sub>A</sub> 467                                     | 703.367<br>412.182  | 2<br>3 | 13.6Å 13.1Å                             |
| 22 | IETMR<br>LGEYGFQNALIVR              | I205-R210<br>L421-R433 | 579.3010 | 4 | 1.167  | E <sub>A</sub> 206<br>E <sub>r</sub> 423                                                        | 359.19<br>790.405   | 2<br>2 | 17.8Å                                   |
| 23 | IETMR<br>VPQVSTPTLVEVSR             | I205-R210<br>V438-R451 | 587.3107 | 4 | -2.486 | E <sub>A</sub> 206<br>E <sub>r</sub> 448                                                        | 359.19<br>806.428   | 2<br>2 | 18.8Å                                   |
| 24 | LKPDPTLDCDFK<br>YLIEIAR             | L139-K151<br>Y161-R167 | 673.0840 | 4 | 1.077  | E <sub>r</sub> 149<br>E <sub>A</sub> 164                                                        | 838.893<br>498.269  | 2<br>2 | 14.9Å                                   |
| 25 | LKPDPTLDCDFKADEK<br>YLIEIAR         | L139-K155<br>Y161-R167 | 627.5087 | 5 | -0.588 | D <sub>r</sub> 153 E <sub>r</sub> 154<br>E <sub>A</sub> 164                                     | 707.332<br>498.269  | 3<br>2 | 16.7Å 15.6Å                             |
| 26 | LVTDLTK<br>VHKECCHGDLLECADDRDLAK    | L257-K263<br>V264-K285 | 897.4279 | 4 | 0.795  | D <sub>A</sub> 260<br>E <sub>A</sub> 282                                                        | 857.511<br>894.072  | 1<br>3 | 9.1Å                                    |
| 27 | LVTDLTK<br>VHKECCHGDLLECADDRDLAK    | L257-K263<br>V264-K285 | 513.2476 | 7 | 0.730  | D <sub>r</sub> 260<br>D <sub>A</sub> 279 D <sub>A</sub> 282                                     | 445.245<br>536.848  | 2<br>5 | 7.8Å, 9.1Å                              |
| 28 | LVTDLTK<br>VHKECCHGDLLECADDRDLAK    | L257-K263<br>V264-K285 | 513.2481 | 7 | 1.704  | D <sub>r</sub> 260<br>D <sub>A</sub> 278 D <sub>A</sub> 279 D <sub>A</sub> 282                  | 445.245<br>536.848  | 2<br>5 | 11.6Å, 7.8Å, 9.1Å                       |
| 29 | LVTDLTK<br>YICDNQDTISSK             | L257-K263<br>Y286-K297 | 605.4583 | 4 | 1.684  | D <sub>A</sub> 260<br>D <sub>A</sub> 292                                                        | 429.259<br>772.330  | 2<br>2 | 18.9Å                                   |
| 30 | LKECCDKP LLEK<br>SHCIAEVEK          | L298-K309<br>S310-K318 | 558.8729 | 5 | -1.841 | E <sub>A</sub> 300 D <sub>A</sub> 303<br>E <sub>r</sub> 317                                     | 534.278<br>586.764  | 3<br>2 | 11.2Å 15.8Å                             |
| 31 | LKECCDKP LLEK<br>SHCIAEVEK          | L298-K309<br>S310-K318 | 465.8965 | 6 | 0.744  | E <sub>A</sub> 300<br>E <sub>r</sub> 317                                                        | 400.961<br>586.764  | 4<br>2 | 11.2Å                                   |
| 32 | LKECCDKP LLEK<br>SHCIAEVEK          | L298-K309<br>S310-K318 | 698.3413 | 4 | 1.014  | E <sub>r</sub> 300<br>E <sub>A</sub> 315                                                        | 816.901<br>570.778  | 2<br>2 | 11.9Å                                   |
| 33 | LKECCDKP LLEK<br>SHCIAEVEK          | L298-K309<br>S310-K318 | 698.3408 | 4 | 0.298  | E <sub>A</sub> 300<br>E <sub>A</sub> 315 E <sub>A</sub> 317                                     | 800.915<br>570.778  | 2<br>2 | 11.9Å 11.2Å                             |
| 34 | LKECCDKP LLEK<br>CCTKPESER          | L298-K309<br>C460-R468 | 721.8368 | 4 | 0.393  | E <sub>A</sub> 300<br>E <sub>A</sub> 467                                                        | 800.914<br>617.769  | 2<br>2 | 26.4Å                                   |

|    |                                        |                        |          |   |        |                                                                                                   |                    |        |                            |
|----|----------------------------------------|------------------------|----------|---|--------|---------------------------------------------------------------------------------------------------|--------------------|--------|----------------------------|
| 35 | LKECCDKP LLEK<br>CCTKPESER             | L298-K309<br>C460-R468 | 721.8368 | 4 | 0.393  | E <sub>r</sub> 300 D <sub>r</sub> 303<br>E <sub>A</sub> 467                                       | 816.901<br>617.769 | 2<br>2 | 26.4Å 31.1Å                |
| 36 | LKECCDKP LLEK<br>NYQEAK                | L298-K309<br>N341-K346 | 494.8425 | 5 | -2.149 | E <sub>r</sub> 300 D <sub>r</sub> 303<br>E <sub>A</sub> 344                                       | 544.935<br>410.702 | 3<br>2 | 40.9Å 41.7Å                |
| 37 | LKHLVDEPQNLIK<br>CCTKPESER             | L400-K412<br>C460-R468 | 580.4977 | 5 | 7.275  | D <sub>r</sub> 405 E <sub>r</sub> 406<br>E <sub>A</sub> 465 E <sub>A</sub> 467                    | 823.959<br>412.183 | 2<br>3 | 13.6Å 13.1Å<br>15.8Å 15.3Å |
| 38 | LCVLHEK<br>TPVSEKVTK                   | L483-K489<br>T490-K498 | 518.7810 | 4 | 1.484  | E <sub>r</sub> 488<br>E <sub>r</sub> 494                                                          | 499.749<br>544.793 | 2<br>2 | 10.7Å                      |
| 39 | LVNELTEFAK<br>SLHTLFGDELCK             | L66-K75<br>S89-K100    | 692.8486 | 4 | -7.32  | E <sub>A</sub> 69<br>E <sub>A</sub> 97                                                            | 616.337<br>744.370 | 2<br>2 | 9.3Å                       |
| 40 | LVNELTEFAK<br>SLHTLFGDELCK             | L66-K75<br>S89-K100    | 692.8496 | 4 | 0.712  | E <sub>A</sub> 72<br>E <sub>A</sub> 97                                                            | 616.337<br>744.370 | 2<br>2 | 13.3Å                      |
| 41 | LVNELTEFAK<br>SLHTLFGDELCK             | L66-K75<br>S89-K100    | 692.8486 | 4 | -7.32  | E <sub>A</sub> 69<br>D <sub>r</sub> 96 E <sub>r</sub> 97                                          | 616.338<br>760.357 | 2<br>2 | 9.3Å 12.1Å                 |
| 42 | LVNELTEFAK<br>SLHTLFGDELCK             | L66-K75<br>S89-K100    | 692.8502 | 4 | 1.578  | E <sub>A</sub> 72<br>D <sub>r</sub> 96 E <sub>r</sub> 97                                          | 616.338<br>760.357 | 2<br>2 | 15.2Å 13.3Å                |
| 43 | NECFLSHKDDSPDLPK<br>KVPQVSTPTLVEVSR    | N123-K138<br>K437-R451 | 746.1718 | 5 | -7.481 | D <sub>A</sub> 135<br>E <sub>A</sub> 448                                                          | 657.309<br>854.493 | 3<br>2 | 13.5Å                      |
| 44 | QNCDQFEK<br>ATEEQLK                    | Q413-K420<br>A562-K568 | 518.7349 | 4 | .292   | E <sub>r</sub> 416<br>E <sub>A</sub> 564                                                          | 584.731<br>443.736 | 2<br>2 | 16.9Å                      |
| 45 | QNCDQFEK<br>CCTKPESER                  | Q413-K420<br>C460-R468 | 605.7531 | 4 | 2.460  | E <sub>r</sub> 419<br>E <sub>r</sub> 467                                                          | 568.745<br>633.756 | 2<br>2 | 16.8Å                      |
| 46 | QNCDQFEK<br>CCTKPESER                  | Q413-K420<br>C460-R468 | 605.7520 | 4 | .645   | E <sub>A</sub> 419<br>E <sub>r</sub> 465                                                          | 584.730<br>633.755 | 2<br>2 | 14.0Å                      |
| 47 | QNCDQFEK<br>CCTKPESER                  | Q413-K420<br>C460-R468 | 605.7518 | 4 | .314   | D <sub>r</sub> 419<br>E <sub>r</sub> 465 E <sub>r</sub> 467                                       | 584.730<br>633.756 | 2<br>2 | 14.0Å 16.8Å                |
| 48 | QNCDQFEK<br>CCTKPESER                  | Q413-K420<br>C460-R468 | 605.7521 | 4 | 0.810  | D <sub>A</sub> 416<br>E <sub>r</sub> 465                                                          | 568.744<br>633.756 | 2<br>2 | 12.6Å                      |
| 49 | QNCDQFEK<br>CCTKPESER                  | Q413-K420<br>C460-R468 | 484.8036 | 5 | 1.768  | D <sub>r</sub> 416<br>E <sub>A</sub> 465 E <sub>A</sub> 467                                       | 584.730<br>412.183 | 2<br>3 | 12.6Å 15.7Å                |
| 50 | QNCDQFEK<br>LGEYGFQNALIVR              | Q413-K420<br>L421-R433 | 684.0776 | 4 | 0.508  | E <sub>A</sub> 419<br>E <sub>A</sub> 423                                                          | 568.744<br>774.420 | 2<br>2 | 8.2Å                       |
| 51 | RPCFSALTPDETYVPK<br>ATEEQLK            | R507-K523<br>A562-K568 | 721.8555 | 4 | 1.171  | E <sub>A</sub> 518<br>E <sub>A</sub> 564                                                          | 974.982<br>443.735 | 2<br>2 | 17.8Å                      |
| 52 | SEIAHR<br>VHKECCHGDLLECADDRADLAK       | S29-R34<br>V264-K285   | 585.9390 | 6 | 1.516  | E <sub>r</sub> 30<br>D <sub>A</sub> 282                                                           | 406.695<br>670.804 | 2<br>4 | 16.7Å                      |
| 53 | SHCIAEVEK<br>CCTKPESER                 | S310-K318<br>C460-R468 | 606.7698 | 4 | 2.091  | E <sub>r</sub> 315 E <sub>r</sub> 317<br>E <sub>r</sub> 467                                       | 586.763<br>633.755 | 2<br>2 | 18.1Å 15.8Å                |
| 54 | SHCIAEVEK<br>CCTKPESER                 | S310-K318<br>C460-R468 | 606.7702 | 4 | 2.751  | E <sub>A</sub> 317<br>E <sub>r</sub> 467                                                          | 570.778<br>633.756 | 2<br>2 | 15.0Å                      |
| 55 | SHCIAEVEK<br>CCTKPESER                 | S310-K318<br>C460-R468 | 485.6177 | 5 | 2.924  | E <sub>r</sub> 317<br>E <sub>A</sub> 465 E <sub>A</sub> 467                                       | 586.764<br>412.183 | 2<br>3 | 20.3Å 15.0Å                |
| 56 | SHCIAEVEK<br>NYQEAK                    | S310-K318<br>N341-K346 | 503.4868 | 4 | 2.604  | E <sub>r</sub> 315<br>E <sub>A</sub> 344                                                          | 586.764<br>410.701 | 2<br>2 | 35.7Å                      |
| 57 | VHKECCHGDLLECADDRADLAK<br>SHCIAEVEK    | V264-K285<br>S310-K318 | 645.9636 | 6 | 4.495  | E <sub>A</sub> 275 D <sub>A</sub> 278 D <sub>A</sub> 279 D <sub>A</sub> 282<br>E <sub>r</sub> 317 | 670.808<br>586.765 | 4<br>2 | 27.6Å 24.5Å 22.8Å 21.2Å    |
| 58 | VHKECCHGDLLECADDRADLAK<br>YICDNQDTISSK | V264-K285<br>Y286-K297 | 707.8174 | 6 | 1.732  | D <sub>A</sub> 278 D <sub>A</sub> 279 D <sub>A</sub> 282<br>D <sub>r</sub> 289                    | 670.807<br>772.330 | 4<br>2 | 16.7Å 15.2Å 10.6Å          |
| 59 | YICDNQDTISSK<br>ECCDKP LLEK            | Y286-K297<br>E300-K309 | 730.8301 | 4 | 1.435  | D <sub>r</sub> 289<br>D <sub>r</sub> 303                                                          | 772.331<br>680.325 | 2<br>2 | 10.9Å                      |
| 60 | YICDNQDTISSK<br>LKECCDKP LLEK          | Y286-K297<br>L298-K309 | 791.1262 | 4 | 3.024  | D <sub>r</sub> 292<br>D <sub>r</sub> 303                                                          | 772.331<br>816.902 | 2<br>2 | 15.0Å                      |
| 61 | YICDNQDTISSK<br>LKECCDKP LLEK          | Y286-K297<br>L298-K309 | 791.1237 | 4 | -0.136 | D <sub>A</sub> 292<br>E <sub>r</sub> 300 D <sub>r</sub> 303                                       | 756.334<br>816.900 | 2<br>2 | 13.4Å 15.0Å                |
| 62 | YICDNQDTISSK<br>SHCIAEVEK              | Y286-K297<br>S310-K318 | 676.0577 | 4 | 2.777  | D <sub>A</sub> 292<br>E <sub>r</sub> 317                                                          | 756.345<br>586.764 | 2<br>2 | 15.5Å                      |

Note: “|” means or; “&” means and; “T”: unsaturated thiol moiety; “A”: alkene moiety.



**Table S-3. Detailed Summary of DSSO Inter-Linked Myoglobin Peptides Identified by LC MS<sup>n</sup>**

| #  | Peptide Seq                                           | AA location          | MS m/z   | z | $\Delta$ (PPM) | Mod. Position                                                               | MS2 m/z             | z      | Distance (C $\alpha$ -C $\alpha$ ) |
|----|-------------------------------------------------------|----------------------|----------|---|----------------|-----------------------------------------------------------------------------|---------------------|--------|------------------------------------|
| 1  | FDKFK<br>KKGHHEAELKPLAQSHATKHK                        | F44-K48<br>K79-K99   | 618.5516 | 5 | 0.116          | K <sub>7</sub> 46<br>K <sub>7</sub> 97                                      | 770.355<br>584.053  | 1<br>4 | 14.6Å                              |
| 2  | FDKFKHLKTEAEMK<br>KHGTVLTLALGGILK                     | F44-K57<br>K64-K78   | 715.5761 | 5 | -0.108         | K <sub>A</sub> 46&K <sub>A</sub> 48&K <sub>7</sub> 51<br>K <sub>7</sub> 64  | 649.311<br>796.963  | 3<br>2 | 11.9Å 15.7Å 18.3Å                  |
| 3  | FKHLK<br>GHHEAELKPLAQSHATKHK                          | F47-K51<br>G81-K99   | 492.2618 | 6 | 1.093          | K <sub>A</sub> 48<br>K <sub>7</sub> 88 K <sub>7</sub> 97                    | 363.719<br>544.037  | 2<br>4 | 27.1Å 17.1Å                        |
| 4  | FKHLK<br>GHHEAELKPLAQSHATKHK                          | F47-K51<br>G81-K99   | 590.5117 | 5 | -0.608         | K <sub>7</sub> 48<br>K <sub>A</sub> 97                                      | 758.406<br>544.037  | 1<br>4 | 17.1Å                              |
| 5  | FKHLK<br>HKIPIK                                       | F47-K51<br>H98-K103  | 391.9812 | 4 | -0.157         | K <sub>7</sub> 48<br>K <sub>A</sub> 99                                      | 363.719<br>411.239  | 2<br>2 | 15.6Å                              |
| 6  | FKHLKTEAEMKASEDLK<br>YLEFISDAIIHVLHSHKHPGDFGADAQGAMTK | F47-K64<br>Y104-K134 | 970.3080 | 6 | 0.463          | K <sub>A</sub> 48&K <sub>7</sub> 51&K <sub>A</sub> 57<br>K <sub>7</sub> 119 | 776.385<br>1152.221 | 3<br>3 | 26.1Å 24.4Å 15.4Å                  |
| 7  | HGTVLTLALGGILK<br>KKGHHEAELKPLAQSHATK                 | H65-K79<br>K80-K97   | 608.5053 | 6 | 1.553          | K <sub>A</sub> 78<br>K <sub>7</sub> 80                                      | 520.987<br>690.017  | 3<br>3 | 5.3Å                               |
| 8  | KHGTVLTLALGGILK<br>NDIAAAYK                           | K64-K78<br>N141-K148 | 647.3630 | 4 | -0.850         | K <sub>7</sub> 64<br>K <sub>A</sub> 146                                     | 796.963<br>488.759  | 2<br>2 | 27.0Å                              |
| 9  | KKGHHEAELKPLAQSHATK<br>NDIAAAYK                       | K79-K97<br>N141-K148 | 837.6671 | 4 | -1.356         | K <sub>A</sub> 79&K <sub>7</sub> 80&K <sub>A</sub> 88<br>K <sub>7</sub> 146 | 768.724<br>976.510  | 3<br>1 | 18.0Å, 18.4Å, 7.1Å                 |
| 10 | KKGHHEAELKPLAQSHATK<br>NDIAAAYK                       | K79-K97<br>N141-K148 | 638.7356 | 5 | 0.486          | K <sub>7</sub> 80 K <sub>7</sub> 88<br>K <sub>7</sub> 146                   | 549.789<br>1008.485 | 4<br>1 | 18.4Å 7.1Å                         |
| 11 | KGHHEAELKPLAQSHATK<br>NDIAAAYK                        | K80-K97<br>N141-K148 | 766.1448 | 4 | 1.629          | K <sub>7</sub> 88<br>K <sub>A</sub> 146                                     | 690.018<br>976.511  | 3<br>1 | 7.1Å                               |
| 12 | LFTGHPETLEKFDK<br>FKHLK                               | L33-K46<br>F47-K51   | 416.0513 | 6 | 0.971          | K <sub>A</sub> 43<br>K <sub>A</sub> 48                                      | 429.721<br>363.719  | 4<br>2 | 8.0Å                               |
| 13 | LFTGHPETLEKFDK<br>HKIPIK                              | L33-K46<br>H98-K103  | 639.3386 | 4 | -1.892         | K <sub>7</sub> 43<br>K <sub>A</sub> 99                                      | 874.421<br>395.253  | 2<br>2 | 7.7Å                               |
| 14 | LFTGHPETLEKFDK<br>HKIPIKYLEFISDAIIHVLHSHK             | L33-K46<br>H98-K119  | 737.5630 | 6 | .054           | K <sub>7</sub> 43<br>K <sub>A</sub> 99 K <sub>A</sub> 103                   | 874.423<br>664.631  | 2<br>4 | 7.7Å 13.0Å                         |
| 15 | LFTGHPETLEKFDK<br>KKGHHEAELKPLAQSHATKHKIPIK           | L33-K46<br>K79-K103  | 801.4203 | 6 | 2.184          | K <sub>7</sub> 43<br>K <sub>A</sub> 88&K <sub>7</sub> 97&K <sub>A</sub> 99  | 874.421<br>755.913  | 2<br>4 | 7.7Å, 20.3Å, 10.5Å                 |
| 16 | LFTGHPETLEKFDK<br>IPIKYLEFISDAIIHVLHSHK               | L33-K46<br>I100-K119 | 831.8438 | 5 | .575           | K <sub>7</sub> 43<br>K <sub>A</sub> 103                                     | 874.421<br>797.454  | 2<br>3 | 13.0Å                              |
| 17 | LFTGHPETLEKFDKFKHLK<br>HKIPIK                         | L33-K51<br>H98-K103  | 561.7958 | 6 | -1.21          | K <sub>7</sub> 43&K <sub>A</sub> 46&K <sub>7</sub> 48<br>K <sub>7</sub> 146 | 636.063<br>395.253  | 4<br>2 | 7.7Å,15.0Å, 15.6Å                  |
| 18 | TEAEMKASEDLK<br>KHGTVLTLALGGILK                       | T52-K63<br>K64-K78   | 754.6490 | 4 | 0.028          | K <sub>A</sub> 57<br>K <sub>7</sub> 64                                      | 703.330<br>796.963  | 2<br>2 | 11.6Å                              |
| 19 | TEAEMKASEDLK<br>YLEFISDAIIHVLHSHKHPGDFGADAQGAMTK      | T52-K65<br>Y104-K134 | 100.0855 | 5 | -2.117         | K <sub>A</sub> 57<br>K <sub>A</sub> 119                                     | 767.378<br>1141.568 | 2<br>3 | 15.4Å                              |

Note: “|” means or; “&” means and; “T”: unsaturated thiol moiety; “A”: alkene moiety.

**Table S-4. Detailed Summary of DSSO Inter-Linked BSA Peptides Identified by LC MS<sup>n</sup>**

| #  | Peptide Seq                                       | AA location            | MS m/z    | z | Δ (PPM) | Mod. Position                                                                  | MS2 m/z              | z      | Distance (Ca-Ca)  |
|----|---------------------------------------------------|------------------------|-----------|---|---------|--------------------------------------------------------------------------------|----------------------|--------|-------------------|
| 1  | ALKAWSVAR<br>LAKEYEATLECCCAK                      | A233-R241<br>L372-K386 | 744.1126  | 4 | 4.399   | K <sub>a</sub> 235<br>K <sub>r</sub> 374                                       | 528.305<br>950.911   | 2<br>2 | 13.5Å             |
| 2  | ALKAWSVAR<br>VHKECCHGDLLCADDRDLAK                 | A233-R241<br>V264-K285 | 754.9589  | 5 | 3.924   | K <sub>a</sub> 235<br>K <sub>r</sub> 266                                       | 528.306<br>900.056   | 2<br>3 | 9.7Å              |
| 3  | ALKAWSVAR<br>LVTDLTKVHK                           | A233-R241<br>L257-K266 | 578.8257  | 4 | 0.636   | K <sub>r</sub> 235<br>K <sub>a</sub> 263                                       | 544.291<br>604.357   | 2<br>2 | 9.0Å              |
| 4  | AEFVEVTKLVTDLTK<br>ADLAKYICDNQDTISSK              | A249-K263<br>A281-K297 | 948.9763  | 4 | 5.128   | K <sub>a</sub> 256<br>K <sub>r</sub> 285                                       | 873.984<br>1014.458  | 2<br>2 | 13.8Å             |
| 5  | ADLAKYICDNQDTISSK<br>ECCDKPLLEKSHCIAEVEK          | A281-K297<br>E300-K318 | 889.6097  | 5 | 1.632   | K <sub>r</sub> 285<br>K <sub>a</sub> 309                                       | 1014.458<br>800.374  | 2<br>3 | 9.1Å              |
| 6  | ADLAKYICDNQDTISSK<br>ECCDKPLLEKSHCIAEVEK          | A281-K297<br>E300-K318 | 889.6097  | 5 | 1.632   | K <sub>r</sub> 285<br>K <sub>r</sub> 304 K <sub>r</sub> 309                    | 1014.458<br>811.031  | 2<br>3 | 11.3Å 9.1Å        |
| 7  | CASIQKFGER<br>LAKEYEATLECCCAK                     | C223-R232<br>L372-K386 | 792.6119  | 4 | 3.328   | K <sub>a</sub> 228<br>K <sub>r</sub> 374                                       | 625.306<br>950.910   | 2<br>2 | 16.4Å             |
| 8  | CASIQKFGER<br>LCVLHEKTPVSEK                       | C223-R232<br>L483-K495 | 723.8583  | 4 | 2.115   | K <sub>a</sub> 228<br>K <sub>r</sub> 489                                       | 625.305<br>813.408   | 2<br>2 | 13.2Å             |
| 9  | CASIQKFGER<br>VTKCCTESLVNR                        | C223-R232<br>V496-R507 | 705.5812  | 4 | 3.067   | K <sub>a</sub> 228<br>K <sub>r</sub> 498                                       | 641.290<br>776.852   | 2<br>2 | 13.1Å             |
| 10 | CASIQKFGER<br>LCVLHEKTPVSEKVTKCCTESLVNR           | C223-R232<br>L483-K507 | 900.6266  | 5 | 0.080   | K <sub>a</sub> 228<br>K <sub>r</sub> 489&K <sub>r</sub> 495&K <sub>a</sub> 498 | 625.305<br>1071.836  | 2<br>3 | 13.2Å 17.6Å 13.1Å |
| 11 | CASIQKFGER<br>SLGKVGTR                            | C223-R232<br>S452-R459 | 543.2742  | 4 | 0.293   | K <sub>r</sub> 228<br>K <sub>a</sub> 455                                       | 641.291<br>436.254   | 2<br>2 | 27.2Å             |
| 12 | DTHKSEIAHR<br>FKDLGEEHFK                          | D25-R34<br>F35-K44     | 520.8516  | 5 | 3.487   | K <sub>a</sub> 28<br>K <sub>r</sub> 36                                         | 416.544<br>668.308   | 3<br>2 | 13.4Å             |
| 13 | DTHKSEIAHR<br>LVTDLTKVHK                          | D25-R34<br>L257-K266   | 501.6659  | 5 | 3.313   | K <sub>a</sub> 28<br>K <sub>r</sub> 263                                        | 416.544<br>620.343   | 3<br>2 | 21.4Å             |
| 14 | FPKAEFVEVTK<br>L9ECCDKPILLEK                      | F246-K256<br>L298-K309 | 746.8786  | 4 | 3.617   | K <sub>r</sub> 248<br>K <sub>a</sub> 299                                       | 674.864<br>809.889   | 2<br>2 | 15.6Å             |
| 15 | FPKAEFVEVTK<br>YICDNQDTISSKLLK                    | F246-K256<br>Y286-K299 | 784.8886  | 4 | 3.457   | K <sub>a</sub> 248<br>K <sub>r</sub> 297                                       | 674.863<br>885.909   | 2<br>2 | 11.7Å             |
| 16 | FKDLGEEHFK<br>LVNELTEFAKTCVADESHAGCEK             | F35-K44<br>L66-K88     | 803.7743  | 5 | 5.714   | K <sub>a</sub> 36<br>K <sub>a</sub> 75                                         | 652.321<br>888.078   | 2<br>3 | 9.2Å              |
| 17 | FKDLGEEHFK<br>ADLAKYICDNQDTISSK                   | F35-K44<br>A281-K297   | 837.8948  | 4 | 5.217   | K <sub>a</sub> 36<br>K <sub>r</sub> 285                                        | 652.320<br>1014.458  | 2<br>2 | 16.7Å             |
| 18 | HPYFYAPELLEYANKYNGVFQEQCAEDK<br>ECCDKPILLEK       | H169-K197<br>E300-309  | 1014.2459 | 5 | -3.074  | K <sub>a</sub> 183<br>K <sub>a</sub> 304                                       | 1224.555<br>673.313  | 3<br>2 | 13.6Å             |
| 19 | HPYFYAPELLEYANKYNGVFQEQCAEDK<br>GACLLPKIETM(ox)R  | H169-K197<br>G198-R209 | 1036.6772 | 5 | 2.428   | K <sub>r</sub> 183<br>K <sub>a</sub> 204                                       | 1235.200<br>728.878  | 3<br>2 | 10.1Å             |
| 20 | HKPKATEEQLK<br>HKPKATEEQLK                        | H558-K568<br>H558-K568 | 555.8971  | 5 | 0.899   | K <sub>a</sub> 561<br>K <sub>r</sub> 561                                       | 454.918<br>697.863   | 3<br>2 | -                 |
| 21 | KQTALVELLK<br>ATEEQLKTVM(ox)ENFVAFVDK             | K548-K557<br>A562-K580 | 879.4573  | 4 | 0.408   | K <sub>a</sub> 548<br>K <sub>r</sub> 568                                       | 598.868<br>1151.104  | 2<br>2 | 14.3Å             |
| 22 | LKPDPNTLCDEFK<br>FWGKYLVEIAR                      | L139-K151<br>F157-R167 | 795.8878  | 4 | 1.369   | K <sub>r</sub> 140<br>K <sub>a</sub> 160                                       | 831.881<br>750.391   | 2<br>2 | 14.7Å             |
| 23 | LKPDPNTLCDEFK<br>SLGKVGTR                         | L139-K151<br>S452-R459 | 638.5690  | 4 | 0.425   | K <sub>r</sub> 140<br>K <sub>a</sub> 455                                       | 831.880<br>436.255   | 2<br>2 | 21.3Å             |
| 24 | LSQKFPK<br>CCTKPESER                              | L242-K248<br>C460-R468 | 543.5061  | 4 | 4.415   | K <sub>a</sub> 245<br>K <sub>r</sub> 463                                       | 451.263<br>626.744   | 2<br>2 | 20.5Å             |
| 25 | LKHLVDEPQNLIK<br>HKPKATEEQLK                      | L400-L412<br>H558-K568 | 603.3317  | 5 | 3.556   | K <sub>r</sub> 401<br>K <sub>a</sub> 559 K <sub>a</sub> 561                    | 816.948<br>454.920   | 2<br>3 | 42.1Å 38.3Å       |
| 26 | LFTFHADICTLPDTEKQIK<br>KQTALVELLK                 | L529-547<br>K548-K557  | 894.9782  | 4 | 6.080   | K <sub>a</sub> 544<br>K <sub>a</sub> 548                                       | 1166.089<br>598.868  | 2<br>2 | 6.4Å              |
| 27 | NECFLSHKDDSPDLPKLPDPNTLCDEFK<br>SLGKVGTR          | N123-K151<br>S452-R459 | 739.8589  | 6 | 2.696   | K <sub>r</sub> 138<br>K <sub>a</sub> 455                                       | 887.159<br>436.254   | 4<br>2 | 19.9Å             |
| 28 | DDSPDLPKLPDPNTLCDEFK<br>SLGKVGTR                  | D131-K151<br>S452-R459 | 773.1790  | 5 | 3.565   | K <sub>r</sub> 138 K <sub>r</sub> 140<br>K <sub>a</sub> 455                    | 991.79<br>436.254    | 3<br>2 | 19.9Å 21.3Å       |
| 29 | QNCDQFEKLGEGYGFQNALIVR<br>ATEEQLKTVM(ox)ENFVAFVDK | Q413-R433<br>A562-K580 | 1226.3392 | 4 | 4.267   | K <sub>r</sub> 420<br>K <sub>a</sub> 568                                       | 1308.109<br>1135.061 | 2<br>2 | 14.6Å             |
| 30 | QNCDQFEKLGEGYGFQNALIVR<br>KVPQVSTPTLVEVSR         | Q413-R433<br>K437-R451 | 1082.5466 | 4 | 1.824   | K <sub>r</sub> 420<br>K <sub>a</sub> 437                                       | 1308.113<br>847.479  | 2<br>2 | 22.3Å             |
| 31 | SLGKVGTR<br>CCTKPESER                             | S452-R459<br>C460-R468 | 536.0019  | 4 | 3.445   | K <sub>a</sub> 455<br>K <sub>r</sub> 463                                       | 436.255<br>626.743   | 2<br>2 | 13.5Å             |
| 32 | TPVSEKVTK<br>HKPKATEEQLK                          | T490-K498<br>H558-K568 | 491.6657  | 5 | 3.475   | K <sub>r</sub> 495<br>K <sub>a</sub> 559 K <sub>a</sub> 561                    | 537.780<br>454.918   | 2<br>3 | 19.8Å 18.7Å       |
| 33 | TPVSEKVTK<br>HKPKATEEQLK                          | T490-K498<br>H558-K568 | 614.3301  | 4 | 3.141   | K <sub>a</sub> 495<br>K <sub>r</sub> 561                                       | 521.794<br>697.861   | 2<br>2 | 18.7Å             |

Note: “|” means or; “&” means and; “T”: unsaturated thiol moiety; “A”: alkene moiety.
